# Supplementary material for: Site requirements for inhibition-free CO oxidation over silica-supported bimetallic PdCu alloys
Source: Royal Society of Chemistry journal article supplement (doi:10.1039/d4cy00255e), 2024-01-01
Supplement: d4cy00255e1.pdf [file d4cy00255e1.pdf]

### Supporting Information

#### Site Requirements for Inhibition-free CO Oxidation over Silica-supported Bimetallic PdCu Alloys

Stephen Thomas Kristy<sup>1,2</sup>, Scott Svadlenak<sup>1</sup>, Adam S. Hoffmann<sup>2</sup>, Simon R. Bare<sup>2</sup>, Konstantinos A. Goulas<sup>1\*</sup>

1. School of Chemical, Biological and Environmental Engineering, Oregon State University, Corvallis, OR 97331
2. Stanford Synchrotron Radiation Lightsource, SLAC National Accelerator Laboratory, Menlo Park, CA 94025

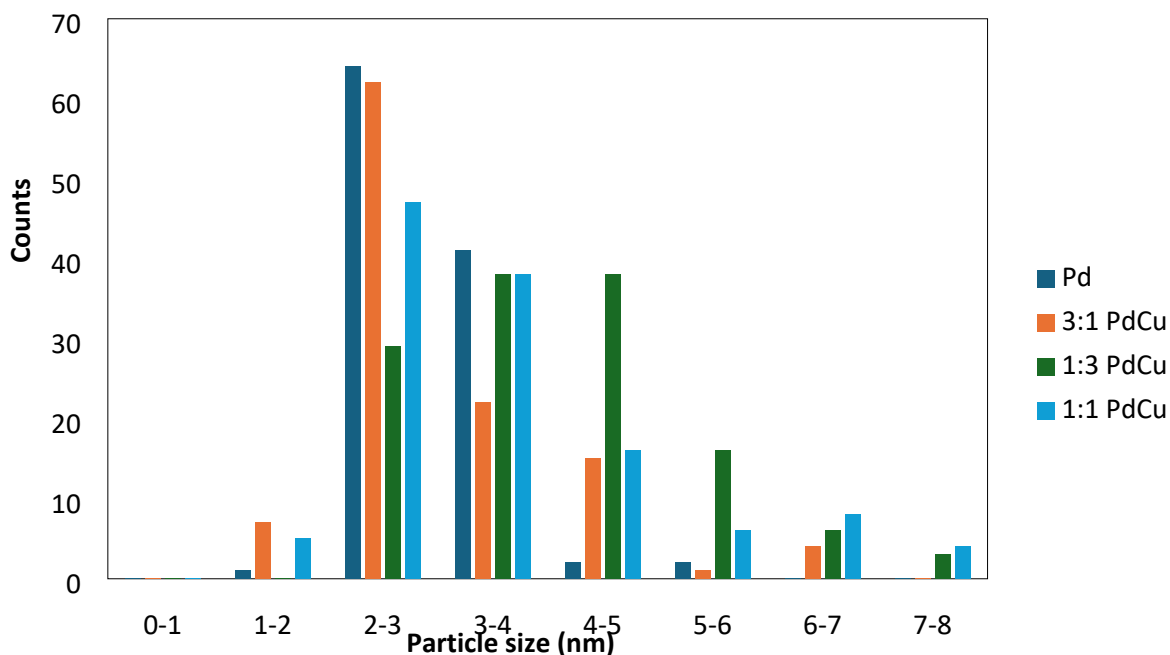

Figure S1: Particle size distribution of silica-supported catalysts, determined by TEM.

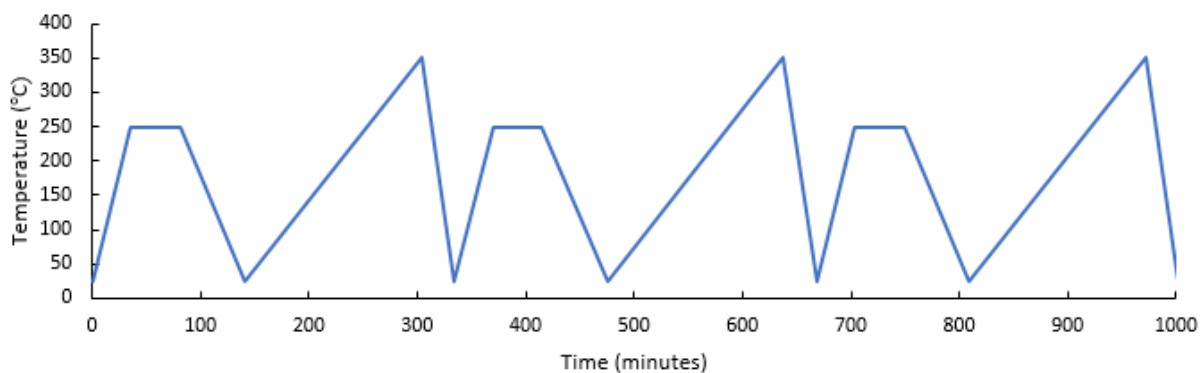

Figure S2 - Temperature profile for TPRs and TPOs performed on a single batch of catalyst loaded into the activity testing reactor system. This represents the heating profile for a series of three TPRs and TPOs we used to completely test catalyst activity.

Table S1: Catalyst and reactor loading parameters.

| Catalyst                                           | Pd   | 3:1 Pd:Cu | 1:1 Pd:Cu | 1:3 Pd:Cu |
|----------------------------------------------------|------|-----------|-----------|-----------|
| wt% Pd (nominal)                                   | 4    | 2.5       | 5.2       | 1.3       |
| wt% Cu (nominal)                                   | 0    | 0.5       | 3.1       | 2.3       |
| Average particle size (nm)                         | 2.9  | 3.1       | 3.7       | 3.4       |
| Standard deviation of particle size (nm)           | 0.6  | 1.0       | 1.6       | 1.3       |
| Dispersion                                         | 0.34 | 0.33      | 0.27      | 0.29      |
| Reactor mass loading (mg catalyst)                 | 8.3  | 4.0       | 10.3      | 7.5       |
| Space velocity ( $\text{L g}^{-1} \text{h}^{-1}$ ) | 990  | 832       | 2080      | 1109      |
| Reactor metal loading ( $\mu\text{mol}$ )          | 7.8  | 8.1       | 9.8       | 9.1       |
| Reactor surface metal loading ( $\mu\text{mol}$ )  | 2.7  | 2.7       | 2.7       | 2.6       |
| Pd:Cu mol ratio (from ICP-OES)                     | -    | 2.7       | 0.79      | 0.35      |

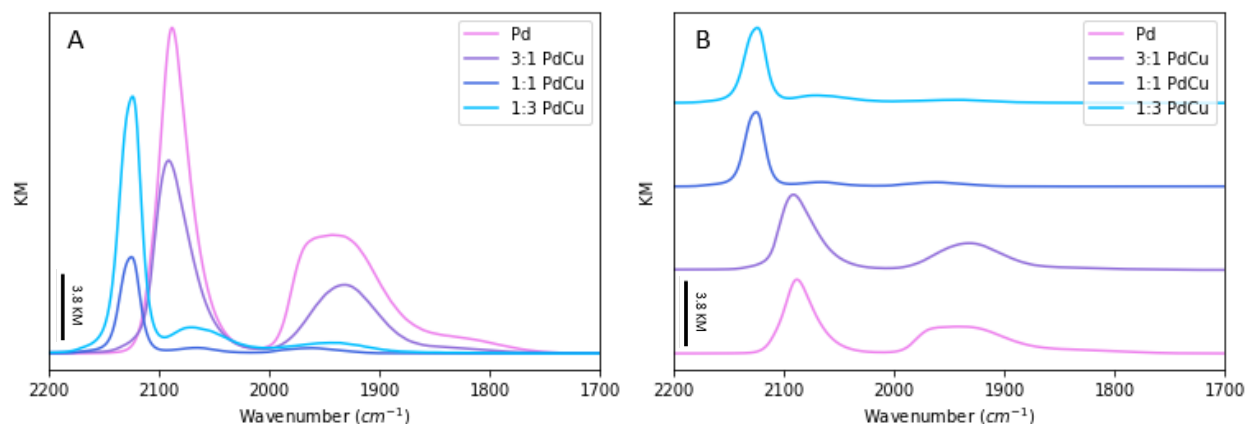

Figure S3 – CO TPD DRIFTS spectra at ambient temperature. (A) shows unadjusted/overlapping data, (B) shows unadjusted stacked data (same data).  $10\text{ }^{\circ}\text{C min}^{-1}$  heating rate used, 15-minute CO saturation ( $20\text{ cm}^3 \text{ min}^{-1}$ ), 15 minute He purge ( $20\text{ cm}^3 \text{ min}^{-1}$ ).

DRIFTS spectral peaks below were fit using python, numpy, “spicy\_optimize.curve\_fit”, as Guassian, Lorentzian, or Voigt style peaks. An individual analysis was performed on each peak at each temperature to determine the appropriate style, and how many peaks were represented under the data. When in question, constrained fits were performed to disprove peak location.<sup>1</sup> Only three temperatures are shown here to save space, but the values of the peak crest and area under each curve are shown in respective tables for all temperatures. These tables were used to construct Figure 6 in the main test. Any values in the tables listed as “null” mean the peak was too small/wide to be fit properly.

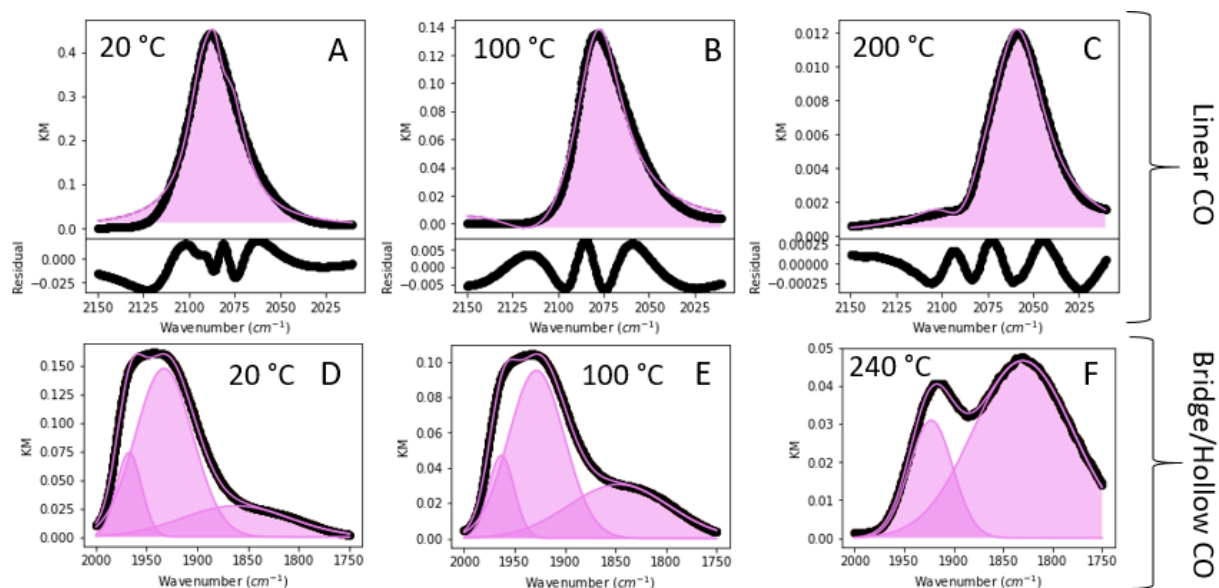

Figure S4 – Peak fitting analysis for Pd during TPD DRIFTS experiments for the Pd catalyst. Two bridge bound peaks were identified for Pd (lower panels).  $10\text{ }^{\circ}\text{C min}^{-1}$  heating rate used, 15-minute CO saturation ( $20\text{ cm}^3\text{ min}^{-1}$ ), 15 minute He purge ( $20\text{ cm}^3\text{ min}^{-1}$ ).

Table S2 – Peak position and area under each peak determined by fitting functions over the series of spectra collected during TPD DRIFTS experiments for the Pd catalyst.  $10\text{ }^{\circ}\text{C min}^{-1}$  heating rate used, 15-minute CO saturation ( $20\text{ cm}^3\text{ min}^{-1}$ ), 15 minute He purge ( $20\text{ cm}^3\text{ min}^{-1}$ ).

| Temperature ( $^{\circ}\text{C}$ ) | Hollow                             |          | Bridge                               |                 |                                      |                 | Linear                               |                 |
|------------------------------------|------------------------------------|----------|--------------------------------------|-----------------|--------------------------------------|-----------------|--------------------------------------|-----------------|
|                                    | Peak Position ( $\text{cm}^{-1}$ ) | Integral | Peak 1 Position ( $\text{cm}^{-1}$ ) | Peak 1 Integral | Peak 2 Position ( $\text{cm}^{-1}$ ) | Peak 2 Integral | Peak 1 Position ( $\text{cm}^{-1}$ ) | Peak 1 Integral |
| 20                                 | 1862                               | 3.5      | 1933                                 | 10.4            | 1967                                 | 2.3             | 2087                                 | 17              |
| 40                                 | 1860                               | 3.5      | 1932                                 | 9.8             | 1967                                 | 2.2             | 2086                                 | 15              |
| 60                                 | 1854                               | 3.5      | 1931                                 | 8.8             | 1966                                 | 2.0             | 2083                                 | 11              |
| 80                                 | 1850                               | 3.6      | 1930                                 | 7.7             | 1965                                 | 1.7             | 2080                                 | 7.6             |
| 100                                | 1846                               | 3.7      | 1928                                 | 6.7             | 1963                                 | 1.4             | 2077                                 | 5.1             |
| 120                                | 1843                               | 3.8      | 1927                                 | 5.7             | 1961                                 | 1.2             | 2074                                 | 3.4             |
| 140                                | 1841                               | 4.1      | 1925                                 | 4.8             | 1959                                 | 0.9             | 2071                                 | 2.2             |
| 160                                | 1839                               | 4.3      | 1924                                 | 4.1             | 1956                                 | 0.6             | 2067                                 | 1.4             |
| 180                                | 1837                               | 4.6      | 1924                                 | 3.3             | 1954                                 | 0.3             | 2062                                 | 0.9             |
| 200                                | 1835                               | 5.0      | 1924                                 | 2.8             | 1952                                 | 0.2             | 2059                                 | 0.6             |
| 220                                | 1833                               | 5.4      | 1924                                 | 2.2             | null                                 | null            | 2057                                 | 0.4             |
| 240                                | 1830                               | 5.7      | 1923                                 | 1.7             | null                                 | null            | 2055                                 | 0.3             |

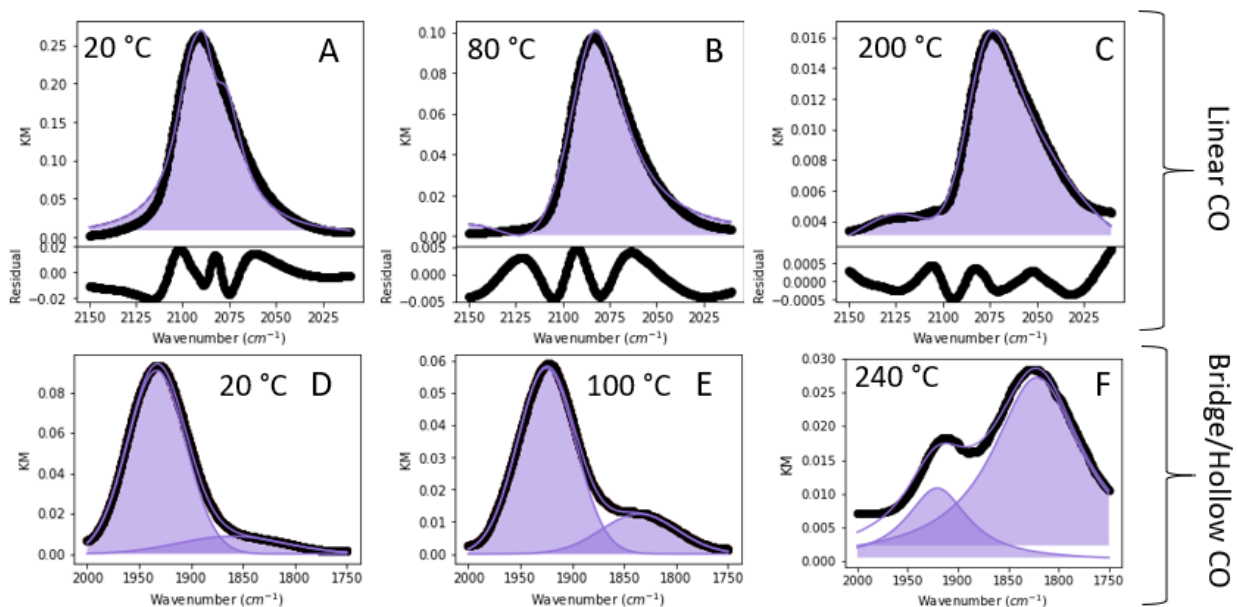

Figure S5- Peak fitting analysis for Pd during TPD DRIFTS experiments for the 3:1 PdCu catalyst. A single bridge bound peaks was identified. 10 °C min<sup>-1</sup> heating rate used, 15-minute CO saturation (20 cm<sup>3</sup> min<sup>-1</sup>), 15 minute He purge (20 cm<sup>3</sup> min<sup>-1</sup>).

Table S3 - Peak position and area under each peak determined by fitting functions over the series of spectra collected during TPD DRIFTS experiments for the 3:1 PdCu catalyst. 10 °C min<sup>-1</sup> heating rate used, 15-minute CO saturation (20 cm<sup>3</sup> min<sup>-1</sup>), 15 minute He purge (20 cm<sup>3</sup> min<sup>-1</sup>).

| Temperature (°C) | Hollow                            |          | Bridge                            |          | Linear                              |                 |
|------------------|-----------------------------------|----------|-----------------------------------|----------|-------------------------------------|-----------------|
|                  | Peak Position (cm <sup>-1</sup> ) | Integral | Peak Position (cm <sup>-1</sup> ) | Integral | Peak 1 Position (cm <sup>-1</sup> ) | Peak 1 Integral |
| 20               | 1862                              | 1.1      | 1933                              | 6.3      | 2090                                | 11              |
| 40               | 1859                              | 1.1      | 1932                              | 5.9      | 2088                                | 10              |
| 60               | 1845                              | 1.0      | 1930                              | 5.4      | 2088                                | 6.8             |
| 80               | 1839                              | 1.1      | 1927                              | 4.7      | 2082                                | 4.3             |
| 100              | 1836                              | 1.2      | 1925                              | 4.0      | 2079                                | 2.5             |
| 120              | 1836                              | 1.6      | 1923                              | 3.2      | 2076                                | 1.4             |
| 140              | 1828                              | 1.5      | 1918                              | 3.3      | 2073                                | 1.1             |
| 160              | 1828                              | 2.0      | 1917                              | 2.7      | 2066                                | 1.0             |
| 180              | 1827                              | 2.4      | 1916                              | 2.1      | 2061                                | 1.0             |
| 200              | 1825                              | 2.7      | 1915                              | 1.7      | null                                | null            |
| 220              | 1824                              | 3.1      | 1917                              | 1.3      | null                                | null            |
| 240              | 1822                              | 3.6      | 1920                              | 1.0      | null                                | null            |

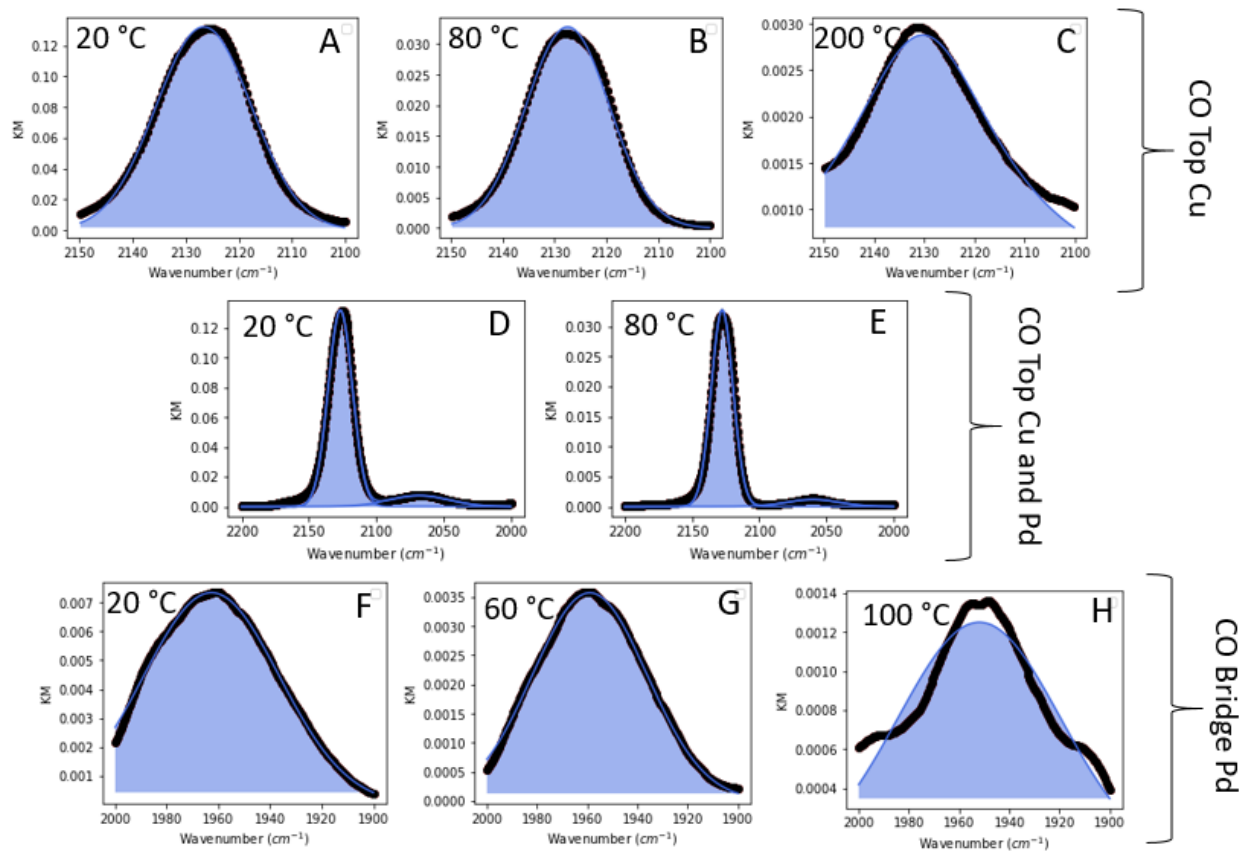

Figure S6 - Peak fitting analysis for Pd during TPD DRIFTS experiments for the 1:1 PdCu catalyst. A single bridge bound peaks was identified.  $10\text{ }^{\circ}\text{C min}^{-1}$  heating rate used, 15-minute CO saturation ( $20\text{ cm}^3\text{ min}^{-1}$ ), 15 minute He purge ( $20\text{ cm}^3\text{ min}^{-1}$ ).

*Table S4 - Peak position and area under each peak determined by fitting functions over the series of spectra collected during TPD DRIFTS experiments for the 1:1 PdCu catalyst. 10 °C min<sup>-1</sup> heating rate used, 15-minute CO saturation (20 cm<sup>3</sup> min<sup>-1</sup>), 15 minute He purge (20 cm<sup>3</sup> min<sup>-1</sup>).*

| Temperature (°C) | Pd Bridge                         |          | Pd Linear                         |               | Cu Linear                         |          |
|------------------|-----------------------------------|----------|-----------------------------------|---------------|-----------------------------------|----------|
|                  | Peak Position (cm <sup>-1</sup> ) | Integral | Peak Position (cm <sup>-1</sup> ) | Peak Integral | Peak Position (cm <sup>-1</sup> ) | Integral |
| 20               | 1963                              | 0.4      | 2068                              | 0.4           | 2127                              | 3.0      |
| 40               | 1961                              | 0.1      | 2066                              | 0.3           | 2127                              | 2.3      |
| 60               | 1959                              | 0.1      | 2064                              | 0.1           | 2127                              | 1.3      |
| 80               | 1955                              | 0.1      | 2060                              | 0.1           | 2127                              | 0.7      |
| 100              | 1952                              | 0.4      | 2057                              | 0.0           | 2128                              | 0.3      |
| 120              | 1952                              | 0.1      | 2053                              | 0.1           | 2129                              | 0.1      |
| 140              | 1948                              | 0.1      | 2046                              | 0.1           | 2130                              | 0.1      |
| 160              | null                              | null     | 2044                              | 0.3           | 2132                              | 0.1      |
| 180              | null                              | null     | null                              | null          | 2131                              | 0.1      |
| 200              | null                              | null     | null                              | null          | 2131                              | 0.1      |

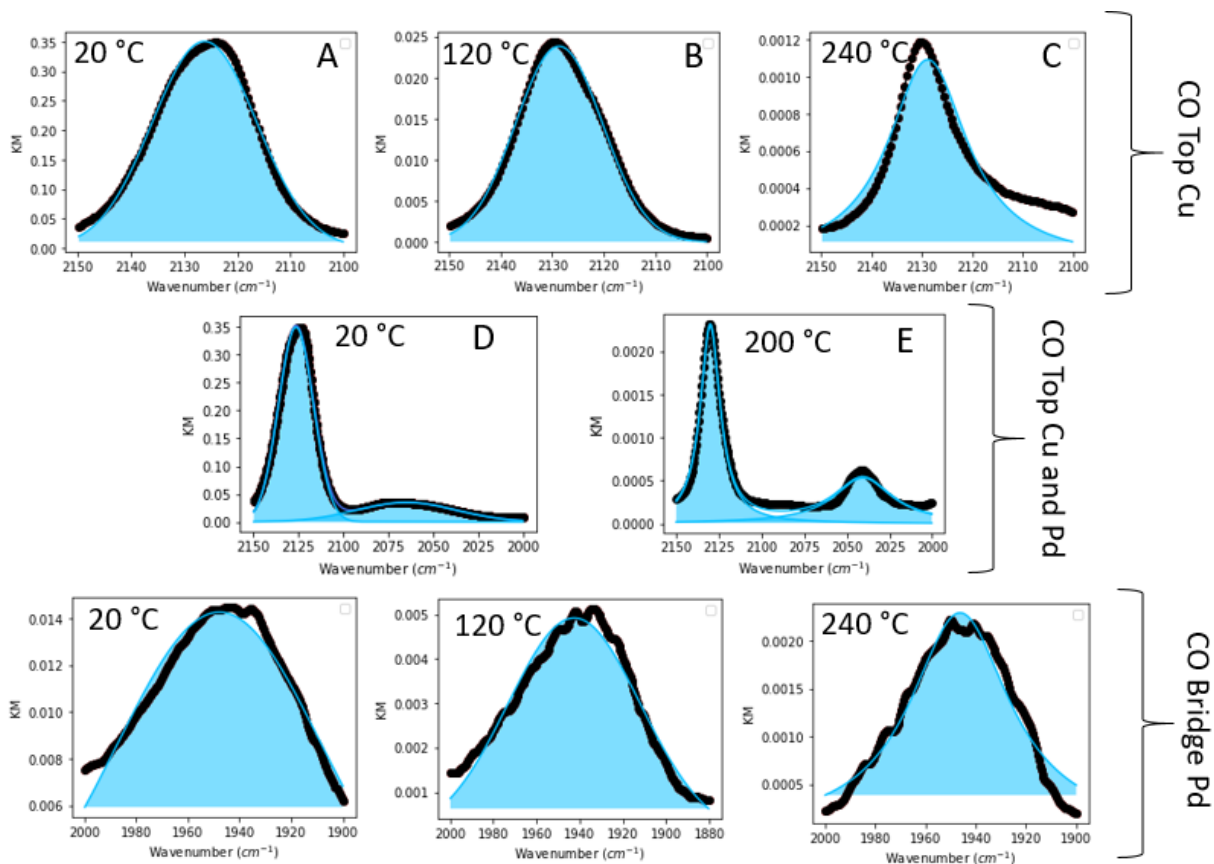

Figure S7 - Peak fitting analysis for Pd during TPD DRIFTS experiments for the 1:3 PdCu catalyst. A single bridge bound peaks was identified. 10 °C min<sup>-1</sup> heating rate used, 15-minute CO saturation (20 cm<sup>3</sup> min<sup>-1</sup>), 15 minute He purge (20 cm<sup>3</sup> min<sup>-1</sup>).



Table S5 - Peak position and area under each peak determined by fitting functions over the series of spectra collected during TPD DRIFTS experiments for the 1:3 PdCu catalyst. 10 °C min<sup>-1</sup> heating rate used, 15-minute CO saturation (20 cm<sup>3</sup> min<sup>-1</sup>), 15 minute He purge (20 cm<sup>3</sup> min<sup>-1</sup>).

| Temperature (°C) | Pd Bridge                         |          | Pd Linear                         |               | Cu Linear                         |          |
|------------------|-----------------------------------|----------|-----------------------------------|---------------|-----------------------------------|----------|
|                  | Peak Position (cm <sup>-1</sup> ) | Integral | Peak Position (cm <sup>-1</sup> ) | Peak Integral | Peak Position (cm <sup>-1</sup> ) | Integral |
| 20               | 1948                              | 1.1      | 2065                              | 2.4           | 2126                              | 8.6      |
| 40               | 1948                              | 1.0      | 2063                              | 2.1           | 2126                              | 7.3      |
| 60               | 1947                              | 0.8      | 2060                              | 1.4           | 2126                              | 4.9      |
| 80               | 1947                              | 0.6      | 2054                              | 0.8           | 2128                              | 0.9      |
| 100              | 1944                              | 0.4      | 2048                              | 0.4           | 2129                              | 0.5      |
| 120              | 1942                              | 0.3      | 2045                              | 0.2           | 2129                              | 0.2      |
| 140              | 1939                              | 0.3      | 2042                              | 0.1           | 2129                              | 0.3      |
| 160              | 1936                              | 0.3      | 2040                              | 0.1           | 2130                              | 0.1      |
| 180              | 1937                              | 0.1      | 2041                              | 0.0           | 2130                              | 0.1      |
| 200              | 1940                              | 0.1      | 2040                              | 0.0           | 2130                              | 0.04     |
| 220              | 1943                              | 0.1      | null                              | null          | 2130                              | 0.03     |
| 240              | 1946                              | 0.1      | null                              | null          | 2128                              | 0.03     |

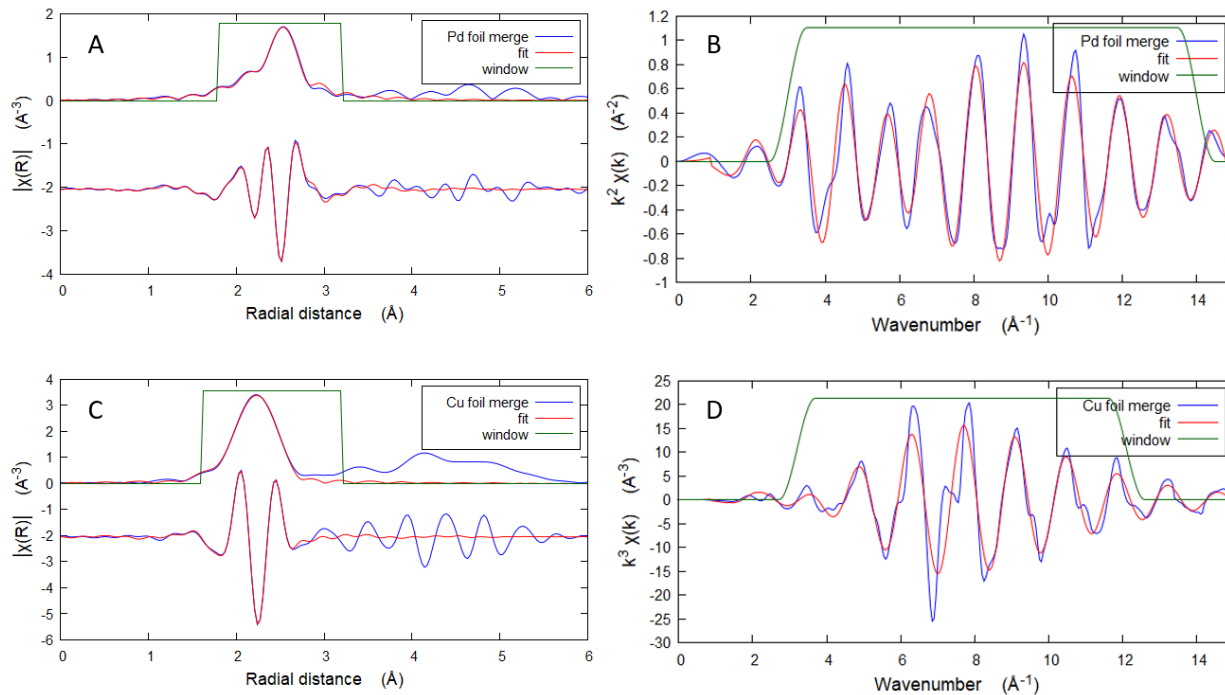

Figure S8 – (A and B – Pd Foil): Pd edge and (C and D – Cu Foil) Cu edge XAS scans shown in  $k^2$ -weighted EXAFS, and the respective fit. Pd Foil fitting ranges:  $k$ : 3.0-13.0  $\text{\AA}^{-1}$ ,  $r$ : 1.75-3.2  $\text{\AA}$ . Cu Foil fitting ranges:  $k$ : 3.0-11.5  $\text{\AA}^{-1}$ ,  $r$ : 1.6-3.2  $\text{\AA}$ .

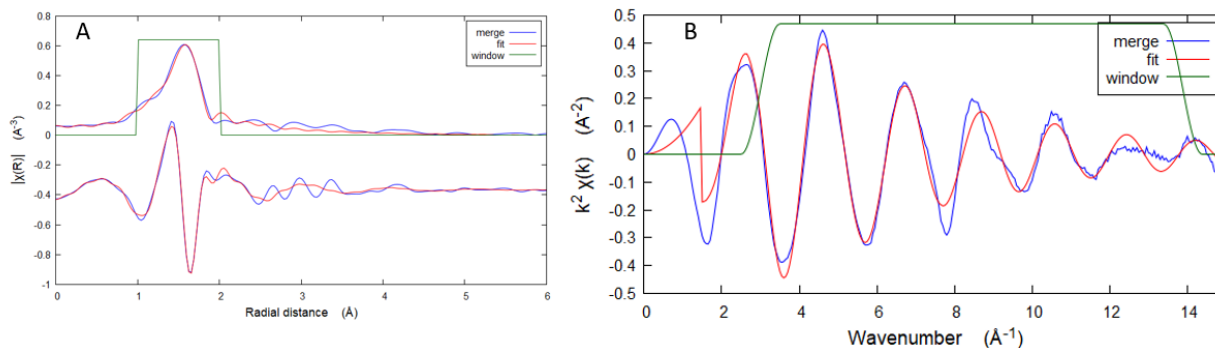

Figure S9 – (Pd/SiO<sub>2</sub>): As Prepared Pd edge XAS scans shown in  $k^2$ -weighted EXAFS, and the respective fit. Fitting ranges:  $k$ : 3.0-13.0  $\text{\AA}^{-1}$ ,  $r$ : 1.0-2.0  $\text{\AA}$ .

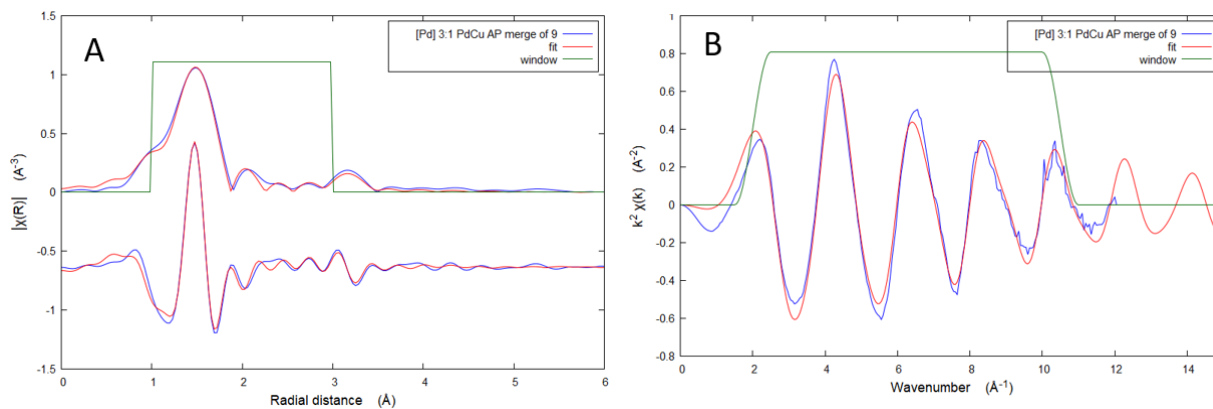

Figure S10 – (3:1 PdCu/SiO<sub>2</sub>): As Prepared Pd edge XAS scans shown in  $k^2$ -weighted EXAFS, and the respective fit. Fitting ranges:  $k$ : 2.0-10.0 Å<sup>-1</sup>;  $r$ : 1.0-3.0 Å.

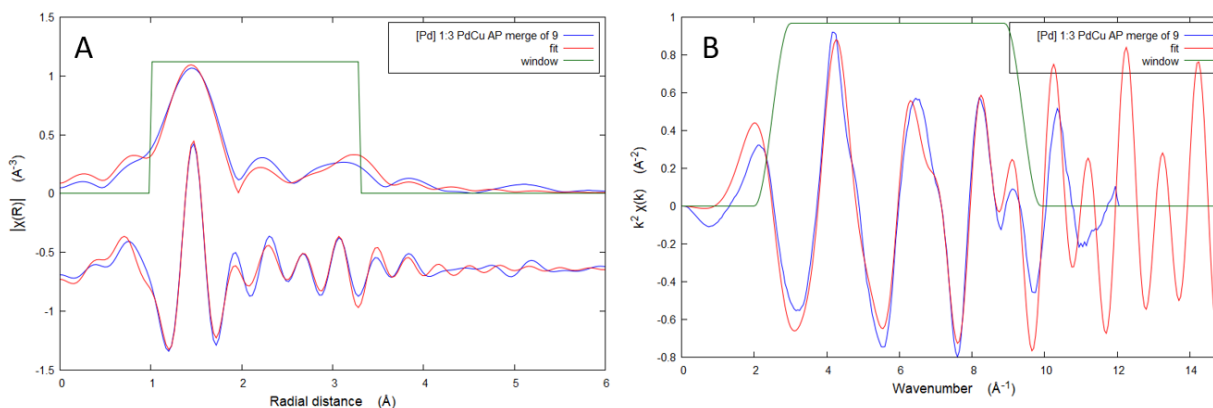

Figure S11 - (1:3 PdCu/SiO<sub>2</sub>): As Prepared Pd edge XAS scans shown in  $k^2$ -weighted EXAFS, and the respective fit. Fitting ranges:  $k$ : 2.0-10.0 Å<sup>-1</sup>;  $r$ : 1.0-3.0 Å.

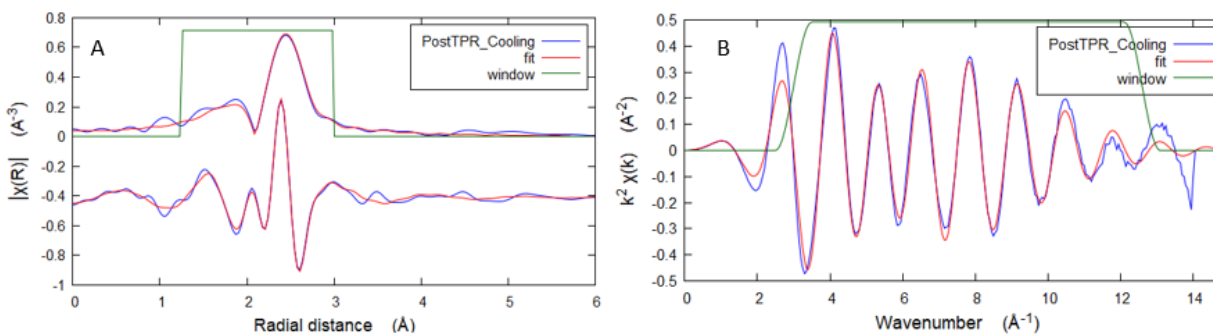

Figure S12 – (Pd/SiO<sub>2</sub>): Post reduction Pd edge XAS scans shown in  $k^2$ -weighted EXAFS, and the respective fit. Fitting ranges:  $k$ : 3.0-13.0 Å<sup>-1</sup>;  $r$ : 1.0-3.0 Å.

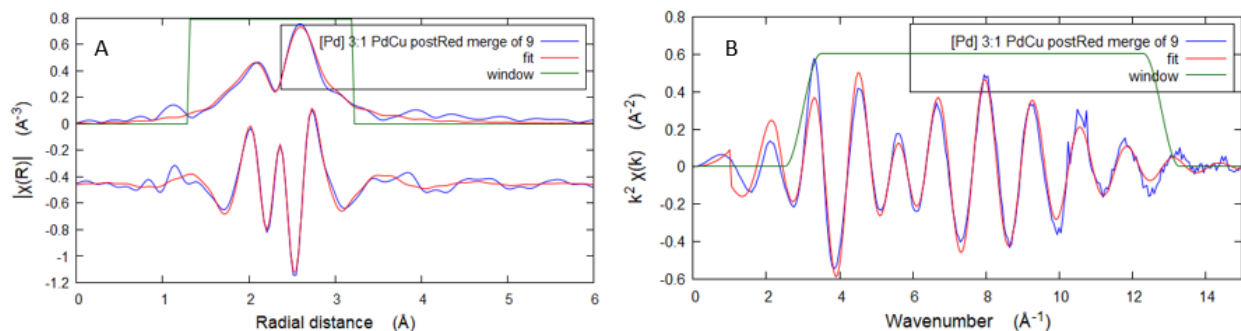

Figure S13 – (3:1 PdCu/SiO<sub>2</sub>): Post reduction Pd edge XAS scans shown in  $k^2$ -weighted EXAFS, and the respective fit. Fitting ranges:  $k$ : 3.0-13.0 Å<sup>-1</sup>,  $r$ : 1.2-3.2 Å.

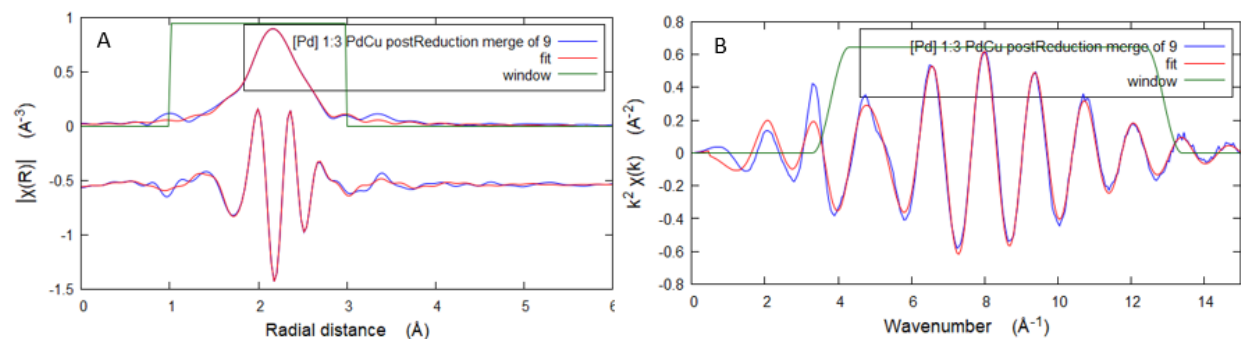

Figure S14 - (1:3 PdCu/SiO<sub>2</sub>): Post reduction Pd edge XAS scans shown in  $k^2$ -weighted EXAFS, and the respective fit. Fitting ranges:  $k$ : 4.0-13.0 Å<sup>-1</sup>,  $r$ : 1.0-3.0 Å.

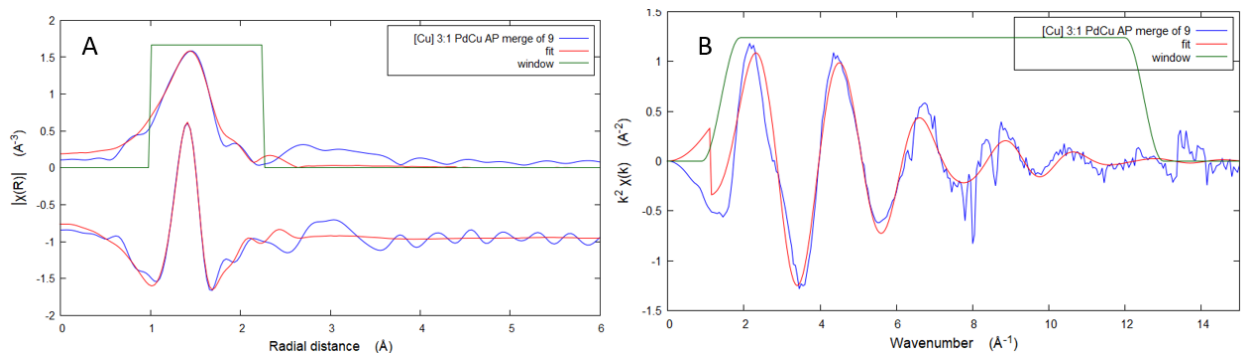

Figure S15 - (3:1 PdCu/SiO<sub>2</sub>): As Prepared Cu edge XAS scans shown in  $k^2$ -weighted EXAFS, and the respective fit. Fitting ranges:  $k$ : 1.5-12.0 Å<sup>-1</sup>,  $r$ : 1.0-2.25 Å.

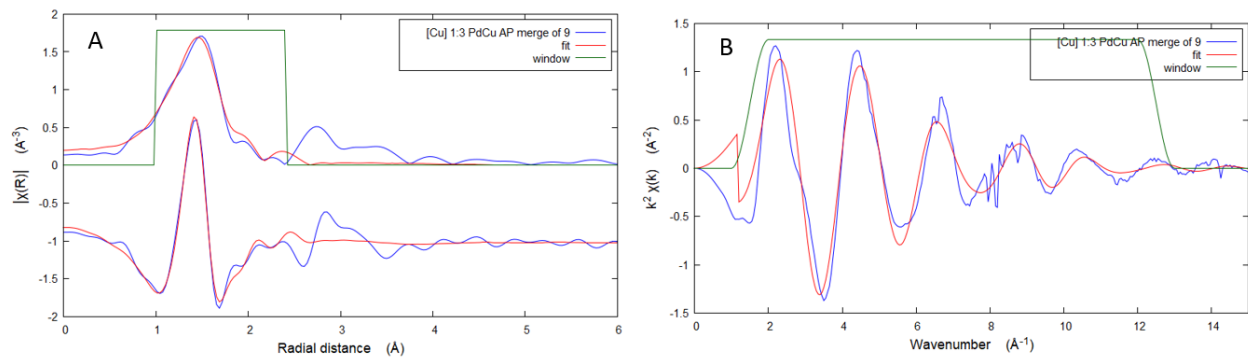

Figure S16 - (1:3 PdCu/SiO<sub>2</sub>): As Prepared Cu edge XAS scans shown in  $k^2$ -weighted EXAFS, and the respective fit. Fitting ranges:  $k$ : 2.0-12.5 Å<sup>-1</sup>,  $r$ : 1.1-2.6 Å.

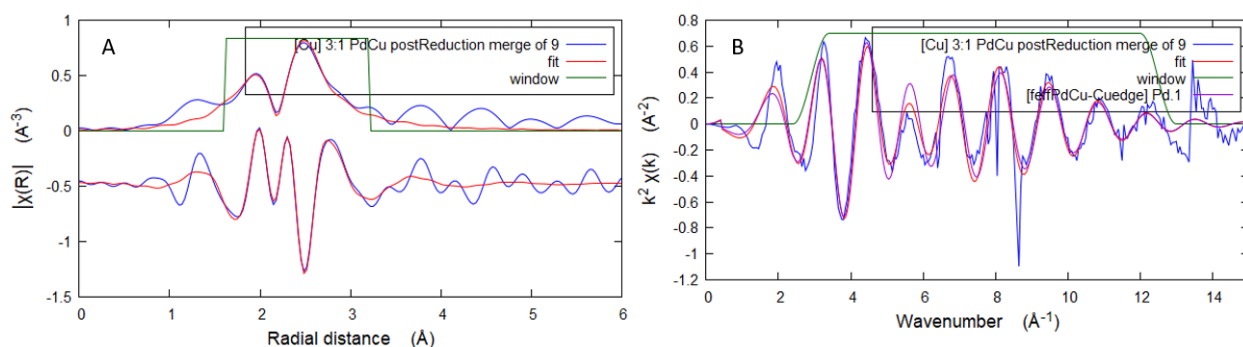

Figure S17 - (3:1 PdCu/SiO<sub>2</sub>): Post reduction Cu edge XAS scans shown in  $k^2$ -weighted EXAFS, and the respective fit. Fitting ranges:  $k$ : 3.0-13.0 Å<sup>-1</sup>,  $r$ : 1.6-3.2 Å.

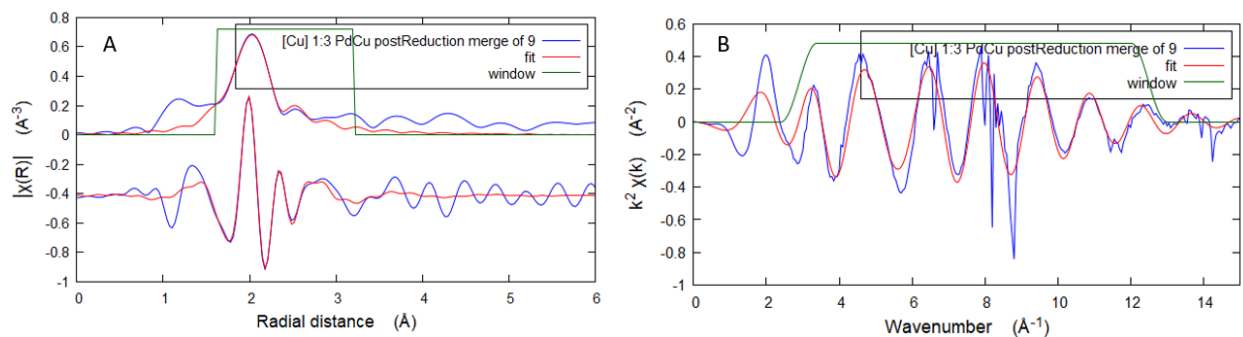

Figure S18 - (1:3 PdCu/SiO<sub>2</sub>): Post reduction Cu edge XAS scans shown in  $k^2$ -weighted EXAFS, and the respective fit. Fitting ranges:  $k$ : 3.0-12.0 Å<sup>-1</sup>,  $r$ : 1.6-3.2 Å.

Table S6 – EXAFS fitting parameters for the as-prepared catalyst. Fitting ranges included in above

|         | Sample   | Path  | C.N.      | R (Å)        | $10^3 \cdot \sigma^2$ (Å <sup>2</sup> ) | $\Delta E_0$ (eV) | Reduced $\chi^2$ |
|---------|----------|-------|-----------|--------------|-----------------------------------------|-------------------|------------------|
| Pd Edge | Pd Foil  | Pd-Pd | 12 ± N/A  | 2.74 ± 0.01  | 5.4 ± 0.3                               | 3.4 ± 0.4         | 6539             |
|         | Pd       | Pd-O  | 1.9 ± 0.1 | 2.01 ± -0.05 | 2.7 ± 1.0                               | 8.3 ± 1.0         | 1396             |
|         | 3:1 PdCu | Pd-O  | 3.1 ± 0.3 | 2.02 ± 0.01  | 1.0 ± 1.3                               | -3.4 ± 1.0        | 771              |
|         | 3:1 PdCu | Pd-Pd | 1.2 ± 2.2 | 3.42 ± 0.08  | 6.5 ± 12.3                              | -3.4 ± 1.0        | 771              |
|         | 1:3 PdCu | Pd-O  | 3.5 ± 0.2 | 2.01 ± 0.01  | 0.2 ± N/A                               | -4.7 ± 1.6        | 7036             |
|         | 1:3 PdCu | Pd-Pd | 2.4 ± 0.5 | 3.41 ± 0.02  | 0.2 ± N/A                               | -4.7 ± 1.6        | 7036             |
| Cu Edge | Cu Foil  | Cu-Cu | 12 ± N/A  | 2.54 ± 0.01  | 8.4 ± 1.1                               | 3.0 ± 1.3         | 1727             |
|         | 3:1 PdCu | Cu-O  | 4.0 ± 0.5 | 1.88 ± 0.02  | 8.6 ± 3.3                               | 4.9 ± 1.1         | 264              |
|         | 3:1 PdCu | Cu-Cu | 0.4 ± 0.8 | 2.54 ± 0.14  | 8.6 ± 3.3                               | 4.9 ± 1.1         | 264              |
|         | 1:3 PdCu | Cu-O  | 4.1 ± 0.5 | 1.90 ± 0.01  | 7.7 ± 2.6                               | 5.0 ± 0.9         | 280              |
|         | 1:3 PdCu | Cu-Cu | 0.4 ± 0.6 | 2.57 ± 0.09  | 7.7 ± 2.6                               | 5.0 ± 0.9         | 280              |

figures.

Table S7 - EXAFS fitting parameters for the post-reduction catalyst. Fitting ranges included in above figures.

|         | Sample   | Path  | C.N.      | R (Å)       | $10^3 \cdot \sigma^2$ (Å <sup>2</sup> ) | $\Delta E_0$ (eV) | Reduced $\chi^2$ |
|---------|----------|-------|-----------|-------------|-----------------------------------------|-------------------|------------------|
| Pd Edge | Pd       | Pd-Pd | 6.5 ± 0.3 | 2.74 ± 0.00 | 13 ± 0.40                               | -12 ± 0.4         | 414              |
|         | 3:1 PdCu | Pd-Pd | 7.1 ± 0.7 | 2.75 ± 0.01 | 12 ± 1.0                                | 3.9 ± 0.8         | 355              |
|         | 3:1 PdCu | Pd-Cu | 2.7 ± 0.7 | 2.63 ± 0.02 | 16 ± 1.3                                | 3.9 ± 0.8         | 355              |
|         | 1:3 PdCu | Pd-Pd | 3.1 ± 0.3 | 2.71 ± 0.00 | 8.4 ± 0.5                               | 0.9 ± 0.9         | 291              |
|         | 1:3 PdCu | Pd-Cu | 5.5 ± 0.4 | 2.59 ± 0.01 | 11 ± 0.6                                | 0.9 ± 0.9         | 291              |
| Cu Edge | 3:1 PdCu | Cu-Cu | 1.5 ± 0.4 | 2.48 ± 0.01 | 15 ± 1.2                                | 0.7 ± 0.7         | 14               |
|         | 3:1 PdCu | Cu-Pd | 4.8 ± 0.4 | 2.59 ± 0.02 | 12 ± 0.9                                | 0.7 ± 0.7         | 14               |
|         | 1:3 PdCu | Cu-Cu | 2.9 ± 0.5 | 2.48 ± 0.01 | 11 ± 1.9                                | -1.2 ± 1.5        | 20               |
|         | 1:3 PdCu | Cu-Pd | 1.4 ± 0.3 | 2.55 ± 0.02 | 8.2 ± 1.5                               | -1.2 ± 1.5        | 20               |

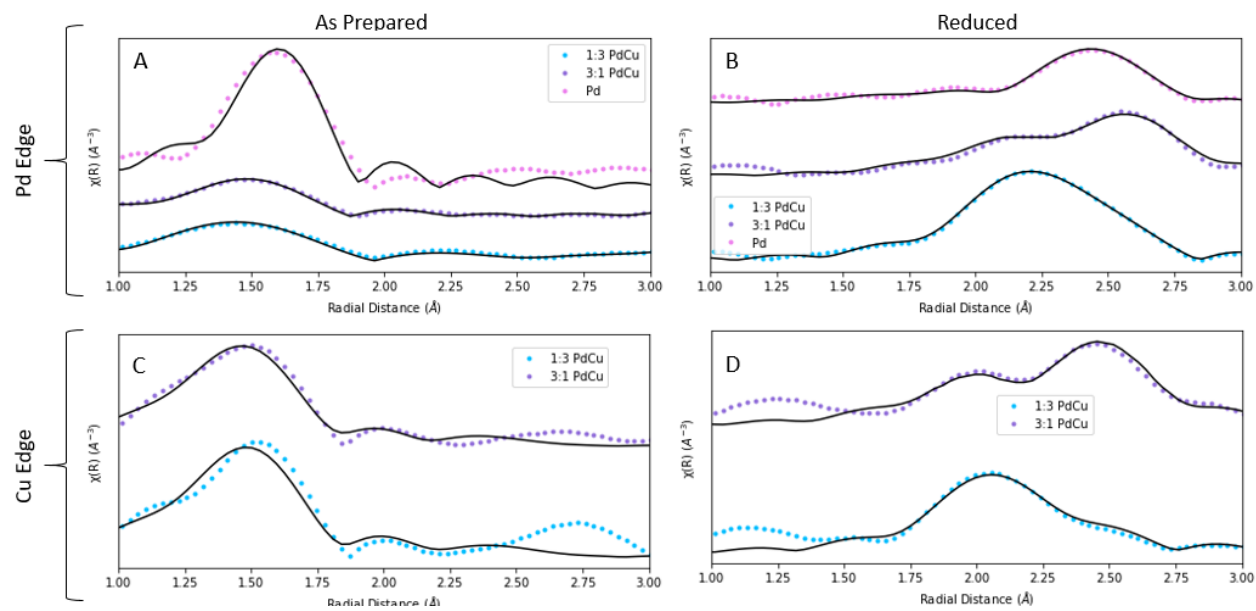

Figure S19 - EXAFS region XAS spectra in Radial Space performed on As Prepared, and Post reduction catalyst samples. The top panels (A and B) show Pd edge data, the bottom show Cu edge data. Panels A and C are As Prepared, B and D are Post reduction.

Table S8 – Linear Combination Fitting Parameters obtained for Pd and Cu edge XANES spectra collected for the as-prepared catalyst samples. PdO and Pd foil references used in Pd edge data. CuO and Cu foil references used in Cu edge data.

|         |         | Standard    | Catalyst    |             |          |
|---------|---------|-------------|-------------|-------------|----------|
|         |         |             | Pd          | 3:1 PdCu    | 1:3 PdCu |
| Pd Edge | Pd Foil | 0.43 ± 0.03 | 0.42 ± 0.05 | 0.35 ± 0.05 |          |
|         | PdO     | 0.57 ± 0.03 | 0.58 ± 0.05 | 0.65 ± 0.05 |          |
| Cu Edge | Cu Foil | NA          | 0.27 ± 0.01 | 0.16 ± 0.01 |          |
|         | CuO     | NA          | 0.73 ± 0.01 | 0.84 ± 0.01 |          |

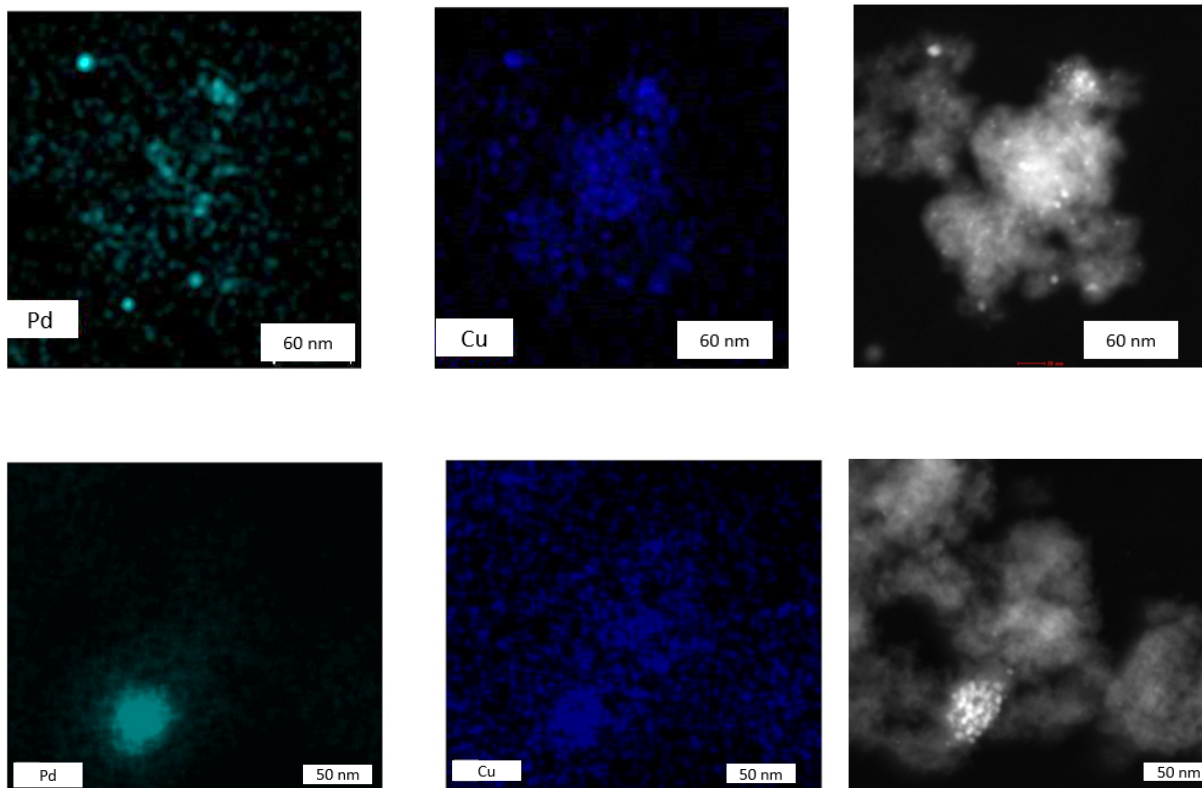

*Figure S20: STEM/EDX micrographs of  $\text{PdCu}_3/\text{SiO}_2$  catalyst (top) and  $\text{Pd}_3\text{Cu}/\text{SiO}_2$  catalyst (bottom)*
